# Supplementary figures and images for: Physiological and functional responses of water-cooled versus traditional radiofrequency ablation of peripheral nerves in rats
Source: PubMed Central journal article supplement — Reg Anesth Pain Med. 2020 Aug 11;45(10):792–8. doi: 10.1136/rapm-2020-101361 (PMC7513268; doi:10.1136/rapm-2020-101361), 2020-08-11

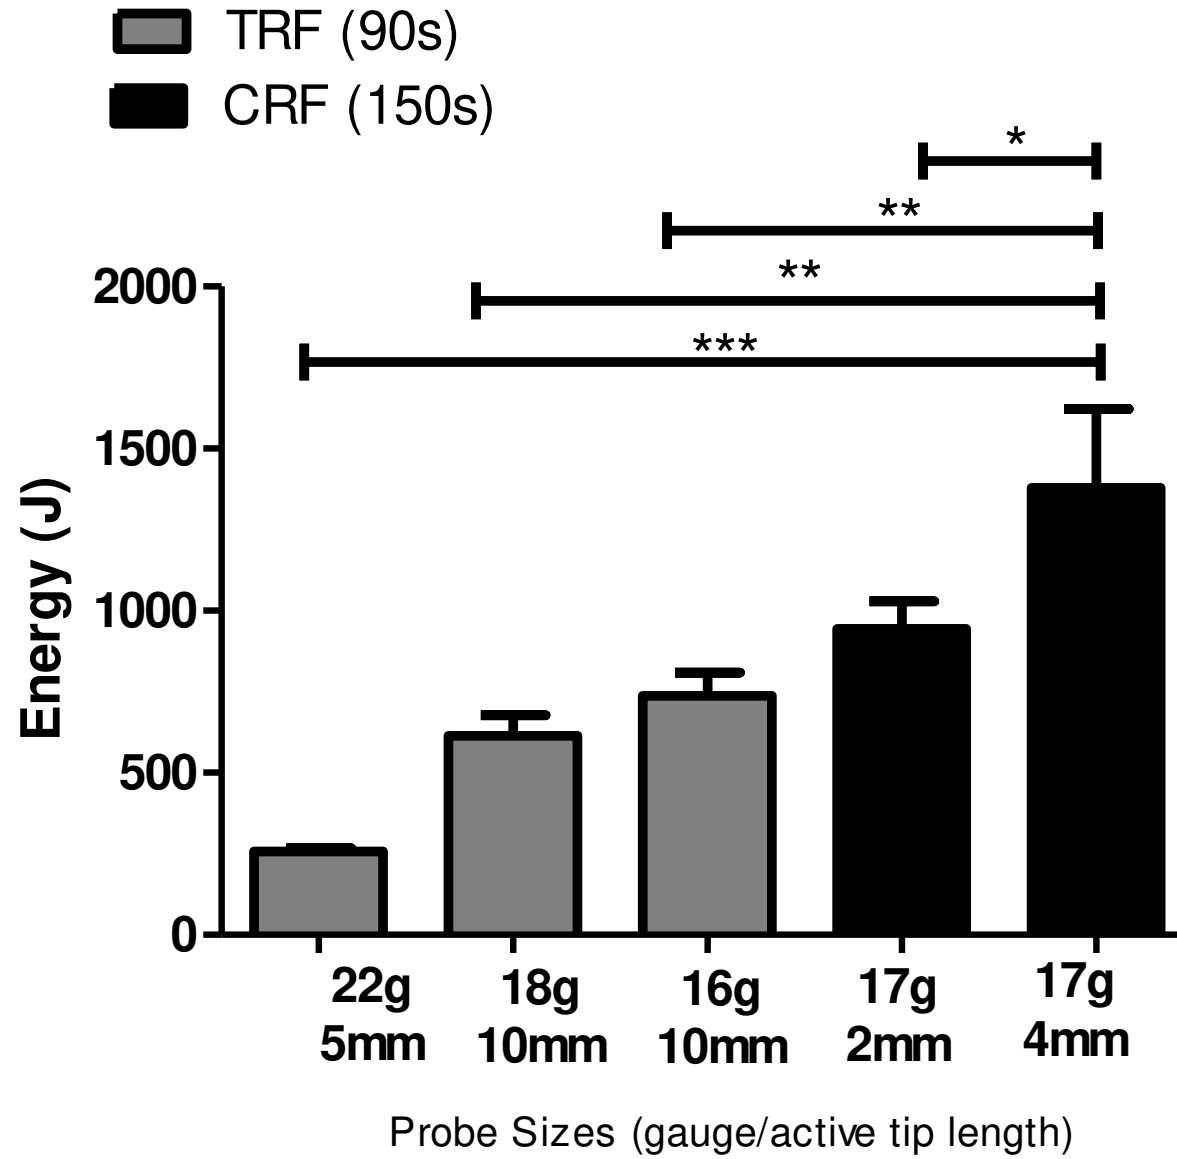

Supplement: rapm-2020-101361supp001.pdf [file rapm-2020-101361supp001.pdf]
